# Supplementary material for: The modulation of metal–insulator transition temperature of vanadium dioxide: a density functional theory study
Source: Royal Society of Chemistry journal article supplement (doi:10.1039/c4tc00778f), 2014-01-01
Supplement: c4tc00778f1.pdf [file c4tc00778f1.pdf]

## Supporting Information

### Tables

**Table SI-1** Thermal dynamic properties of the transition metal oxides and  $M_{0.0625}V_{0.9375}O_2$  (the DFT calculation are carried out without spin-polarization, units:  $\text{kJ}\cdot\text{mol}^{-1}$  for enthalpy and  $\text{J}\cdot\text{K}^{-1}\cdot\text{mol}^{-1}$  for entropy)

**Table SI-2** Equilibrium free energies, lattice parameters, and Fermi energies of the  $M_{0.0625}V_{0.9375}O_2$  (the DFT calculations are carried without spin-polarization, and the lattice parameters are scaled to four units of  $M_{0.0625}V_{0.9375}O_2$ )

**Table SI-3** Free energies calculated from DFT +  $U$  method, including the transition metal doped  $VO_2$  ( $M_1$ ) and transition metals

### Figures

**Figure SI-1** Distribution diagram of the transition metal doped  $VO_2$  ( $M_1$ ) on the  $\beta\sim V_0$  plane (the DFT calculations were carried out without spin-polarization)

**Figure SI-2** Distribution diagram of the transition metal doped  $VO_2$  ( $M_1$ ) on the plane of their decomposition enthalpies and entropies (the DFT calculations were carried out without spin-polarization)

**Table SI-1** Thermal dynamic properties of the transition metal oxides and  $M_{0.0625}V_{0.9375}O_2$  (the DFT calculation are carried out without spin-polarization, units:  $\text{kJ}\cdot\text{mol}^{-1}$  for enthalpy and  $\text{J}\cdot\text{K}^{-1}\cdot\text{mol}^{-1}$  for entropy)

| Oxides                  | $\Delta_f H$ [oxide] <sup>(a)</sup> | $\Delta_f H$ [ $M_{0.0625}V_{0.9375}O_2$ ] <sup>(b)</sup> | $\Delta H$ <sup>(c)</sup> | $\Delta S$ <sup>(d)</sup> |
|-------------------------|-------------------------------------|-----------------------------------------------------------|---------------------------|---------------------------|
| $\text{Sc}_2\text{O}_3$ | -1908.8                             | -729.08                                                   | 0.44                      | 4.47                      |
| TiO                     | -519.7                              | -723.69                                                   | 22.22                     | 10.88                     |
| $\text{Ti}_2\text{O}_3$ | -1520.9                             | -723.69                                                   | 7.17                      | 4.47                      |
| $\text{TiO}_2$          | -944.0                              | -723.69                                                   | -4.30                     | -1.94                     |
| $\text{VO}_2$           | -717.6 <sup>(e)</sup>               | -713.59                                                   | 0.00                      | 0.0                       |
| $\text{Cr}_2\text{O}_3$ | -1139.7                             | -703.06                                                   | -1.55                     | 4.47                      |
| $\text{Cr}_3\text{O}_4$ | -1531.0                             | -703.06                                                   | 2.17                      | 6.60                      |
| $\text{CrO}_2$          | -598.0                              | -703.06                                                   | -3.30                     | -1.94                     |
| MnO                     | -385.2                              | -697.91                                                   | 4.84                      | 10.88                     |
| $\text{MnO}_2$          | -520.0                              | -697.91                                                   | -3.58                     | -1.94                     |
| FeO                     | -272.0                              | -695.42                                                   | 9.43                      | 10.88                     |
| $\text{Fe}_3\text{O}_4$ | -1118.4                             | -695.42                                                   | 3.13                      | 6.60                      |
| $\text{Fe}_2\text{O}_3$ | -824.2                              | -695.42                                                   | 0.67                      | 4.47                      |
| CoO                     | -237.9                              | -692.61                                                   | 8.75                      | 10.88                     |
| $\text{Co}_3\text{O}_4$ | -891.0                              | -692.61                                                   | 5.06                      | 6.60                      |
| $\text{Ni}_2\text{O}_3$ | -489.5                              | -687.47                                                   | 3.18                      | 4.47                      |
| $\text{Cu}_2\text{O}$   | -168.6                              | -685.57                                                   | 11.32                     | 17.29                     |
| CuO                     | -157.3                              | -685.57                                                   | 6.75                      | 10.88                     |

|                                |         |         |        |        |
|--------------------------------|---------|---------|--------|--------|
| ZnO                            | -350.5  | -695.44 | 4.55   | 10.88  |
| Y <sub>2</sub> O <sub>3</sub>  | -1905.3 | -723.10 | -5.43  | 4.47   |
| ZrO <sub>2</sub>               | -1100.1 | -727.10 | -10.65 | -1.94  |
| NbO                            | -405.8  | -719.03 | 24.68  | 10.88  |
| NbO <sub>2</sub>               | -796.2  | -719.03 | 0.28   | -1.94  |
| Nb <sub>2</sub> O <sub>5</sub> | -1899.5 | -719.03 | -9.32  | -8.35  |
| MoO <sub>2</sub>               | -588.9  | -706.98 | 1.18   | -1.94  |
| RuO <sub>2</sub>               | -305.0  | -692.33 | 4.28   | -1.94  |
| RuO <sub>4</sub>               | -239.3  | -692.33 | 8.38   | -27.59 |
| Rh <sub>2</sub> O <sub>3</sub> | -343.0  | -689.56 | 9.85   | 4.47   |
| PdO                            | -85.4   | -679.54 | 5.21   | 10.88  |
| Ag <sub>2</sub> O              | -31.1   | -674.92 | 4.96   | 17.29  |
| CdO                            | -258.4  | -685.63 | 0.49   | 10.88  |
| La <sub>2</sub> O <sub>3</sub> | -1793.7 | -713.49 | -11.55 | 4.47   |
| HfO <sub>2</sub>               | -1144.7 | -731.83 | -8.70  | -1.94  |
| Ta <sub>2</sub> O <sub>5</sub> | -2046.0 | -725.60 | -7.32  | -8.35  |
| WO <sub>2</sub>                | -589.7  | -711.60 | 5.75   | -1.94  |
| WO <sub>3</sub>                | -842.9  | -711.60 | -10.07 | -14.77 |
| Re <sub>2</sub> O <sub>7</sub> | -1240.1 | -699.41 | -8.34  | -21.18 |
| OsO <sub>4</sub>               | -394.1  | -690.27 | -3.35  | -27.59 |
| IrO <sub>2</sub>               | -274.1  | -688.57 | 2.45   | -1.94  |
| HgO                            | -90.8   | -671.51 | -3.16  | 10.88  |

---

<sup>(a)</sup> Formation enthalpies for the oxides adopted from Lide R. D. (ed.), CRC Handbook of Chemistry and Physics, Internet Version, 2005; <sup>(b)</sup> Formation enthalpies for the metal doped  $M_{0.0625}V_{0.9375}O_2$ ; <sup>(c)</sup> Decomposition enthalpies for  $M_{0.0625}V_{0.9375}O_2$ ; <sup>(d)</sup> Decomposition entropies for  $M_{0.0625}V_{0.9375}O_2$ ; <sup>(e)</sup> adopted from J. Qi, G. Ning, and Y. Lin, Synthesis, Characterization, and Thermodynamic Parameters of Vanadium Dioxide. Mater. Res. Bull. **2008**, 43(8-9): 2300-2307.

**Table SI-2** Equilibrium free energies, lattice parameters, and Fermi energies of the  $M_{0.0625}V_{0.9375}O_2$  (the DFT calculations are carried without spin-polarization, and the lattice parameters are scaled to four units of  $M_{0.0625}V_{0.9375}O_2$ )

| Dopants | $U_0$ (eV) | $V_0$ ( $\text{\AA}^3$ ) | $a$ ( $\text{\AA}$ ) | $b$ ( $\text{\AA}$ ) | $c$ ( $\text{\AA}$ ) | $\beta$ (deg) | $E_f$ (eV) |
|---------|------------|--------------------------|----------------------|----------------------|----------------------|---------------|------------|
| Sc      | -22.1171   | 122.99                   | 5.6911               | 9.2835               | 10.969               | 121.908       | 4.115      |
| Ti      | -22.1701   | 121.72                   | 5.6452               | 9.2761               | 10.9242              | 121.667       | 4.4575     |
| V       | -21.9166   | 121.00                   | 5.6452               | 9.2761               | 10.9242              | 121.667       | 4.4575     |
| Cr      | -22.0611   | 120.46                   | 5.6115               | 9.2622               | 10.892               | 121.669       | 4.4217     |
| Mn      | -21.9714   | 120.16                   | 5.609                | 9.2459               | 10.8875              | 121.651       | 4.144      |
| Fe      | -21.9017   | 120.18                   | 5.6055               | 9.2501               | 10.8774              | 121.533       | 4.4706     |
| Co      | -21.7961   | 120.20                   | 5.6187               | 9.2417               | 10.881               | 121.670       | 4.1501     |
| Ni      | -21.6462   | 121.01                   | 5.6455               | 9.2468               | 10.9066              | 121.773       | 4.3391     |
| Cu      | -21.5108   | 122.22                   | 5.6831               | 9.2582               | 10.9322              | 121.802       | 4.1879     |
| Zn      | -21.4601   | 122.29                   | 5.6798               | 9.2615               | 10.9486              | 121.857       | 4.301      |
| Y       | -22.0716   | 125.70                   | 5.7402               | 9.3531               | 11.0538              | 122.057       | 4.1846     |
| Zr      | -22.2431   | 123.83                   | 5.7009               | 9.3062               | 10.9876              | 121.816       | 4.4171     |
| Nb      | -22.2643   | 122.85                   | 5.6613               | 9.304                | 10.9668              | 121.725       | 4.0523     |
| Mo      | -22.1838   | 121.99                   | 5.6287               | 9.299                | 10.9458              | 121.604       | 4.6546     |
| Ru      | -21.9285   | 121.43                   | 5.612                | 9.3006               | 10.9144              | 121.506       | 4.5708     |
| Rh      | -21.7742   | 121.61                   | 5.6397               | 9.2811               | 10.9233              | 121.702       | 4.0976     |
| Pd      | -21.5397   | 122.59                   | 5.6714               | 9.299                | 10.9405              | 121.800       | 4.2852     |
| Ag      | -21.3446   | 124.39                   | 5.7454               | 9.2964               | 10.9857              | 122.007       | 4.1101     |
| Cd      | -21.3358   | 124.47                   | 5.7383               | 9.3085               | 10.9925              | 122.009       | 4.1924     |

---

|    |          |        |        |        |         |         |        |
|----|----------|--------|--------|--------|---------|---------|--------|
| La | -21.8759 | 127.52 | 5.7891 | 9.3771 | 11.0812 | 122.001 | 4.2731 |
| Hf | -22.3803 | 123.41 | 5.6937 | 9.3031 | 10.9685 | 121.829 | 4.4862 |
| Ta | -22.4349 | 122.75 | 5.6606 | 9.2985 | 10.963  | 121.694 | 4.2912 |
| W  | -22.3619 | 122.12 | 5.6306 | 9.3057 | 10.9439 | 121.585 | 4.8144 |
| Re | -22.1984 | 121.73 | 5.6116 | 9.3022 | 10.9444 | 121.540 | 4.5558 |
| Os | -22.0304 | 121.47 | 5.6099 | 9.2933 | 10.9382 | 121.551 | 4.332  |
| Ir | -21.8630 | 121.63 | 5.6277 | 9.3004 | 10.9205 | 121.662 | 4.156  |
| Pt | -21.5980 | 122.18 | 5.6578 | 9.2884 | 10.9319 | 121.713 | 4.6549 |
| Au | -21.3010 | 123.63 | 5.7279 | 9.2767 | 11.0277 | 122.436 | 4.0549 |
| Hg | -21.1459 | 125.15 | 5.7535 | 9.3194 | 11.0103 | 122.007 | 4.1941 |

---

**Table SI-3** Free energies calculated from DFT +  $U$  method, including the transition metal doped  $\text{VO}_2$  ( $M_1$ ) and transition metals

| $\text{MV}_{15}\text{O}_{32}$  | $U_0$ (eV)<br>without spin | $U_0$ (eV)<br>with spin | Metals <sup>(a)</sup> | $U_0$ (eV) |
|--------------------------------|----------------------------|-------------------------|-----------------------|------------|
| $\text{ScV}_{15}\text{O}_{32}$ | -353.8736                  | -362.5680               | $\text{Sc}_2$         | -12.4036   |
| $\text{TiV}_{15}\text{O}_{32}$ | -354.7223                  | -364.1440               | $\text{Ti}_2$         | -15.8902   |
| $\text{V}_{16}\text{O}_{32}$   | -350.6649                  | -360.3872               | $\text{V}_2$          | -11.1264   |
| $\text{CrV}_{15}\text{O}_{32}$ | -352.9780                  | -362.5872               | $\text{Cr}_2$         | -19.2462   |
| $\text{MnV}_{15}\text{O}_{32}$ | -351.5424                  | -360.8544               | $\text{Mn}_{58}$      | -524.4708  |
| $\text{FeV}_{15}\text{O}_{32}$ | -350.4277                  | -358.9040               | $\text{Fe}_2$         | -16.6806   |
| $\text{CoV}_{15}\text{O}_{32}$ | -348.7379                  | -356.8064               | $\text{Co}_2$         | -14.2326   |
| $\text{NiV}_{15}\text{O}_{32}$ | -346.3386                  | -354.8128               | $\text{Ni}_4$         | -22.2812   |
| $\text{CuV}_{15}\text{O}_{32}$ | -344.1726                  | -351.8720               | $\text{Cu}_4$         | -14.8748   |
| $\text{ZnV}_{15}\text{O}_{32}$ | -343.3611                  | -351.5043               | $\text{Zn}_2$         | -2.5396    |
| $\text{YV}_{15}\text{O}_{32}$  | -353.1456                  | -362.2928               | $\text{Y}_2$          | -12.9322   |
| $\text{ZrV}_{15}\text{O}_{32}$ | -355.8902                  | -365.6512               | $\text{Zr}_2$         | -17.0944   |
| $\text{NbV}_{15}\text{O}_{32}$ | -356.2286                  | -366.0016               | $\text{Nb}_2$         | -20.4482   |
| $\text{MoV}_{15}\text{O}_{32}$ | -354.9401                  | -364.4592               | $\text{Mo}_2$         | -21.8712   |
| $\text{RuV}_{15}\text{O}_{32}$ | -350.8554                  | -359.8160               | $\text{Ru}_2$         | -18.5618   |
| $\text{RhV}_{15}\text{O}_{32}$ | -348.3864                  | -356.9408               | $\text{Rh}_4$         | -29.0864   |
| $\text{PdV}_{15}\text{O}_{32}$ | -344.6355                  | -353.9296               | $\text{Pd}_4$         | -20.7320   |
| $\text{AgV}_{15}\text{O}_{32}$ | -341.5129                  | -349.2496               | $\text{Ag}_4$         | -11.3088   |
| $\text{CdV}_{15}\text{O}_{32}$ | -341.3726                  | -349.9731               | $\text{Cd}_2$         | -1.8200    |

---

|                                   |           |           |                 |          |
|-----------------------------------|-----------|-----------|-----------------|----------|
| LaV <sub>15</sub> O <sub>32</sub> | -350.0142 | -359.7952 | La <sub>2</sub> | -9.8574  |
| HfV <sub>15</sub> O <sub>32</sub> | -358.0843 | -367.8848 | Hf <sub>2</sub> | -19.9120 |
| TaV <sub>15</sub> O <sub>32</sub> | -358.9580 | -368.9856 | Ta <sub>2</sub> | -23.7258 |
| WV <sub>15</sub> O <sub>32</sub>  | -357.7907 | -367.9456 | W <sub>2</sub>  | -26.0380 |
| ReV <sub>15</sub> O <sub>32</sub> | -355.1737 | -364.6896 | Re <sub>2</sub> | -24.8500 |
| OsV <sub>15</sub> O <sub>32</sub> | -352.4866 | -361.7104 | Os <sub>2</sub> | -22.5066 |
| IrV <sub>15</sub> O <sub>32</sub> | -349.8075 | -358.6480 | Ir <sub>4</sub> | -35.4260 |
| PtV <sub>15</sub> O <sub>32</sub> | -345.5677 | -355.4384 | Pt <sub>4</sub> | -24.2320 |
| AuV <sub>15</sub> O <sub>32</sub> | -340.8163 | -350.0016 | Au <sub>4</sub> | -13.0828 |
| HgV <sub>15</sub> O <sub>32</sub> | -338.3340 | -347.0369 | Hg <sub>2</sub> | -0.4278  |

---

<sup>(a)</sup> Calculated from the most stable crystal form at 298.15 K and 1 atm.



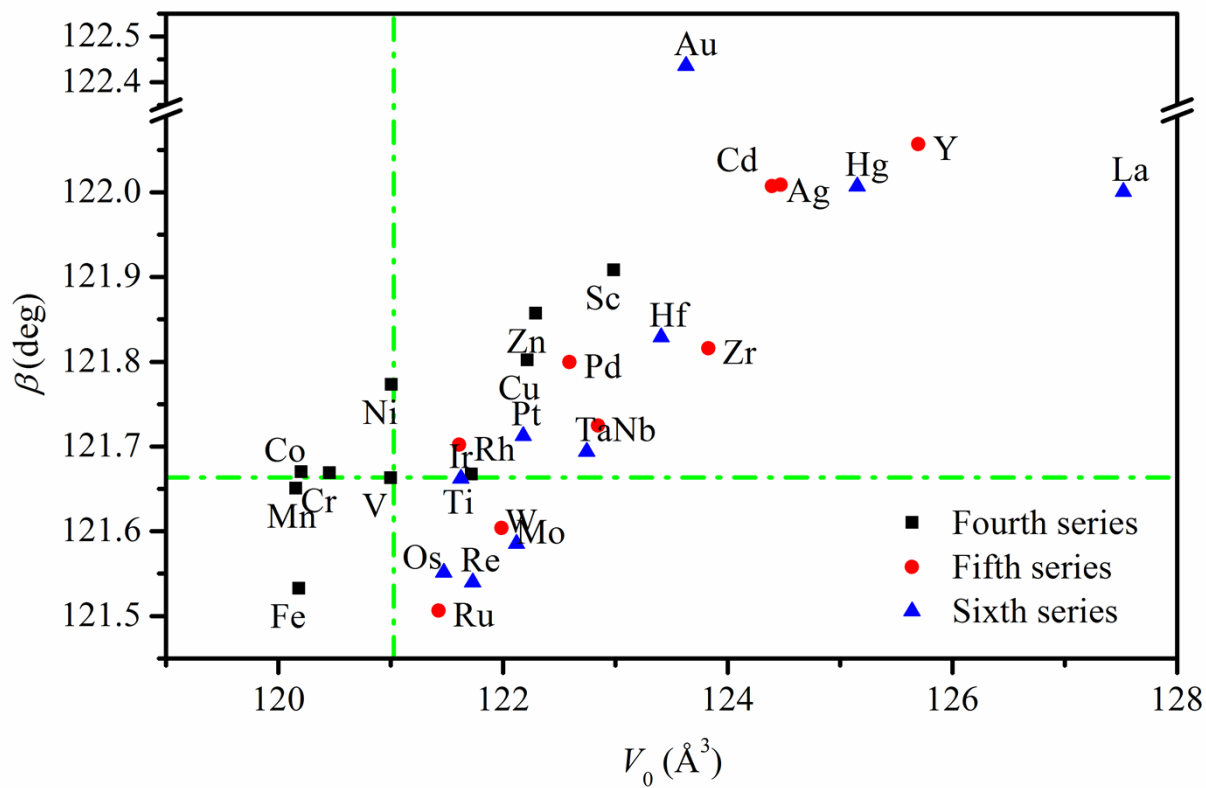

**Figure SI-1** Distribution diagram of the transition metal doped  $\text{VO}_2$  ( $M_1$ ) on the  $\beta$ - $V_0$  plane (the DFT calculations were carried out without spin-polarization)

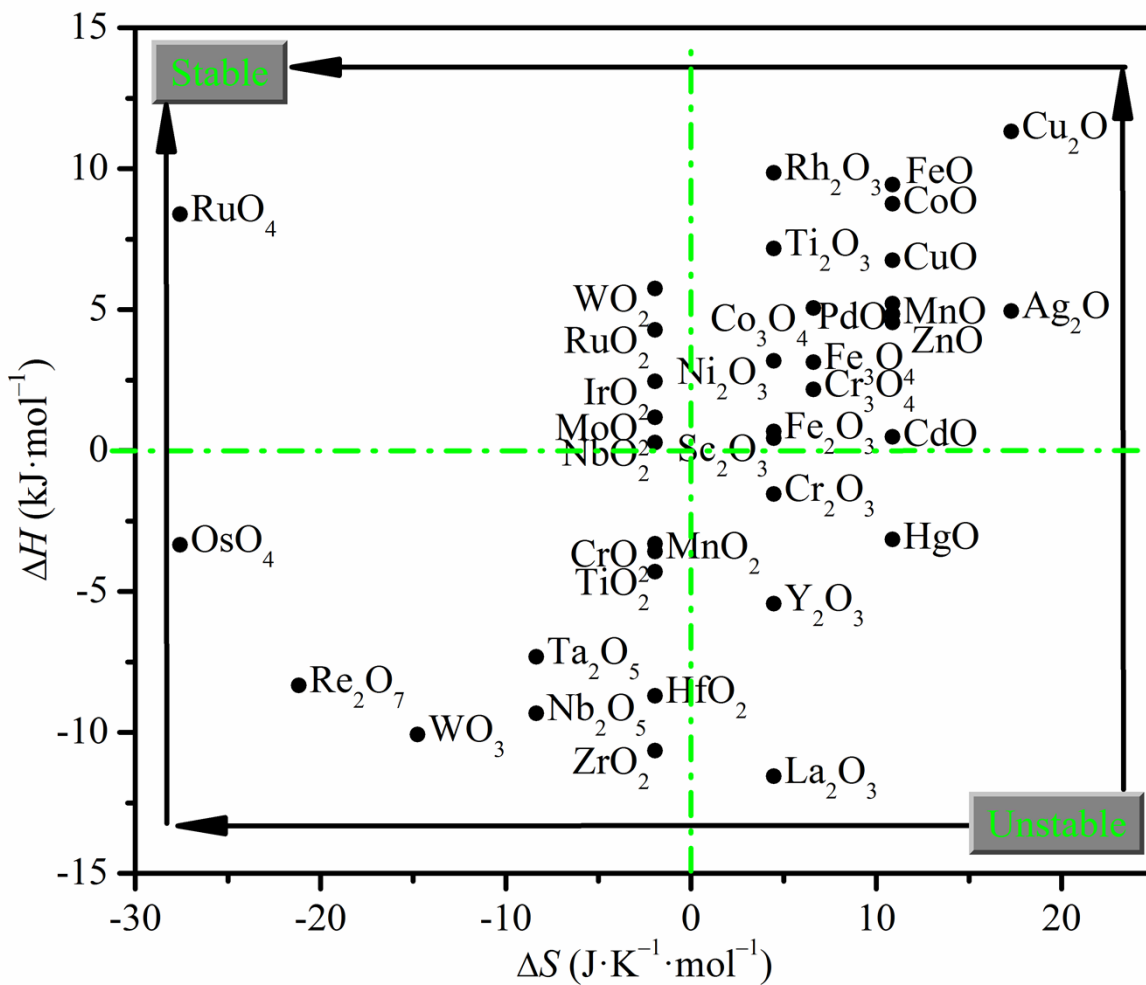

**Figure SI-2** Distribution diagram of the transition metal doped  $\text{VO}_2$  ( $M_1$ ) on the plane of their decomposition enthalpies and entropies (the DFT calculations were carried out without spin-polarization)
